1 Comparison of SARS-CoV-2 infection in two non-human primate species: rhesus  
2 and cynomolgus macaques

3

4

5 Kinga P. Böszörményi<sup>1</sup>, Marieke A. Stammes<sup>2</sup>, Zahra C. Fagrouch<sup>1</sup>, Gwendoline Kiemenyi-  
6 Kayere<sup>1</sup>, Henk Niphuis<sup>1</sup>, Daniella Mortier<sup>1</sup>, Nikki van Driel<sup>3</sup>, Ivonne Nieuwenhuis<sup>2</sup>, Ella  
7 Zuiderwijk-Sick<sup>4</sup>, Lisette Meijer<sup>2</sup>, Petra Mooij<sup>1</sup>, Ed J. Remarque<sup>1</sup>, Gerrit Koopman<sup>1</sup>, Alexis C. R.  
8 Hoste<sup>5</sup>, Patricia Sastre<sup>5</sup>, Bart L. Haagmans<sup>6</sup>, Ronald E. Bontrop<sup>7,8</sup>, Jan A.M. Langermans<sup>3,9</sup>, Willy  
9 M. Bogers<sup>1</sup>, Ernst J. Verschoor<sup>1\*</sup>, and Babs E. Verstrepen<sup>1</sup>

10

11 <sup>1</sup>Department of Virology, Biomedical Primate Research Centre (BPRC), Rijswijk, The  
12 Netherlands

13 <sup>2</sup>Department of Parasitology, BPRC, Rijswijk, The Netherlands

14 <sup>3</sup>Animal Science Department, BPRC, Rijswijk, The Netherlands

15 <sup>4</sup>Alternatives unit, BPRC, Rijswijk, The Netherlands

16 <sup>5</sup>Eurofins-Inmunología y Genética Aplicada (Eurofins-INGENASA), Madrid, Spain.

17 <sup>6</sup>Department of Viroscience, Erasmus University Medical Center, Rotterdam, The  
18 Netherlands

19 <sup>7</sup>Department of Comparative Genetics and Refinement, BPRC, Rijswijk, The Netherlands

20 <sup>8</sup>Department of Biology, Theoretical Biology and Bioinformatics, Utrecht University, Utrecht,  
21 The Netherlands

22 <sup>9</sup>Department of Population Health Sciences, Unit Animals in Science and Society, Veterinary  
23 Faculty, Utrecht University, Utrecht, The Netherlands

24

25 \*Corresponding author:

26 E-mail: [verschoor@bprc.nl](mailto:verschoor@bprc.nl) (EV)

27

## 28 **Abstract**

29 SARS-CoV-2 is a coronavirus that sparked the current COVID-19 pandemic. To stop the  
30 shattering effect of COVID-19, effective and safe vaccines, and antiviral therapies are urgently  
31 needed. To facilitate the preclinical evaluation of intervention approaches, relevant animal  
32 models need to be developed and validated. Rhesus macaques (*Macaca mulatta*) and  
33 cynomolgus macaques (*Macaca fascicularis*) are widely used in biomedical research and serve  
34 as models for SARS-CoV-2 infection. However, differences in study design make it difficult to  
35 compare and understand potential species-related differences. Here, we directly compared  
36 the course of SARS-CoV-2 infection in the two genetically closely-related macaque species.  
37 After inoculation with a low passage SARS-CoV-2 isolate, clinical, virological, and  
38 immunological characteristics were monitored.

39 Both species showed slightly elevated body temperatures in the first days after exposure while  
40 a decrease in physical activity was only observed in the rhesus macaques and not in  
41 cynomolgus macaques. The virus was quantified in tracheal, nasal, and anal swabs, and in  
42 blood samples by qRT-PCR, and showed high similarity between the two species.  
43 Immunoglobulins were detected by various enzyme-linked immunosorbent assays (ELISAs)  
44 and showed seroconversion in all animals by day 10 post-infection. The cytokine responses  
45 were highly comparable between species and computed tomography (CT) imaging revealed  
46 pulmonary lesions in all animals. Consequently, we concluded that both rhesus and  
47 cynomolgus macaques represent valid models for evaluation of COVID-19 vaccine and  
48 antiviral candidates in a preclinical setting.

49

50

## 51 **Author summary**

52 SARS-CoV-2 infection can have a wide range of symptoms. It can cause asymptomatic or mild  
53 disease, but can also have a severe, potentially deadly outcome. Vaccines and antivirals will  
54 therefore be crucial in fighting the current COVID-19 pandemic. For testing these prophylactic  
55 and therapeutic treatments, and investigating the progression of infection and disease  
56 development, animal models play an essential role. In this study, we compare the course of  
57 SARS-CoV-2 infection in rhesus and cynomolgus macaques. Both species showed moderate  
58 disease symptoms as shown by pulmonary lesions by CT imaging. Shedding of infectious virus  
59 from the respiratory system was also documented. This study provides a detailed description  
60 of the pathogenesis of a low-passage SARS-CoV-2 isolate in two macaque models and suggests  
61 that both species represent an equally good model in research for both COVID-19 prophylactic  
62 and therapeutic treatments.  
63

## 64 **Introduction**

65 At the end of 2019, the first cases of coronavirus disease 2019 (COVID-19) were described in  
66 the Wuhan region, China [1]. Since then, the causative agent of COVID-19, the Severe Acute  
67 Respiratory Syndrome Coronavirus 2 (SARS-CoV-2) has spread rapidly across the globe,  
68 leading the World Health Organization to officially declare COVID-19 a pandemic on 11 March  
69 2020. To halt the devastating impact of this disease and the ongoing pandemic, vaccines and  
70 antiviral therapies are desperately needed, as well as fundamental knowledge to understand  
71 the mode of infection and its associated pathologies. Hence, enormous efforts are initiated to  
72 develop a wide range of COVID-19 vaccines.

73 Between humans, transmission mainly occurs via aerosolized droplets after sneezing or  
74 coughing or via direct contact with contaminated surfaces. Similar to the related SARS-CoV,  
75 SARS-CoV-2 enters the body via docking with its spike (S) protein to the angiotensin-  
76 converting enzyme-2 (ACE2) receptor protein [2]. ACE2 is abundantly expressed on cells of the  
77 respiratory system but also on a variety of other organ tissues, including those of the brain  
78 and the gastrointestinal tract [3]. This wide-spread distribution of the ACE2 receptor may  
79 explain the complex clinical picture of COVID-19. The spectrum of COVID-19 ranges from  
80 asymptomatic or mild disease, via flu-like illness to a severe, potentially deadly disease [4].  
81 The most typical hallmark of severe COVID-19 is pneumonia leading to respiratory failure,  
82 which occurs after the onset of dyspnea and hypoxemia [5]. However, COVID-19 patients may  
83 also suffer from a variety of other symptoms, including amongst other gastrointestinal  
84 symptoms, neurological disorders, coagulopathy, and cardiac injury [5-8].

85 Animal models to investigate the progression of infection and disease development, and to  
86 evaluate prophylactic and therapeutic treatment options, are essential to warrant progress in  
87 SARS-CoV-2 fundamental and applied research. Different animal species have shown their

88 value in SARS-CoV-2 research. Originally developed to study SARS-CoV [9], transgenic mice  
89 that express the ACE2 receptor elucidated various aspects of COVID-19 [10, 11]. Rodent  
90 species, such as the Syrian hamster, turned out to be susceptible to infection with SARS-CoV-  
91 2, and hamsters were subsequently utilized to test a live-attenuated YF17D-vectored SARS-  
92 CoV2 vaccine candidate [12, 13]. Ferrets represent an established animal model to study the  
93 pathology and transmission of respiratory viruses, like influenza viruses [14]. During the  
94 course of SARS-CoV infection, viral replication was documented in the upper and lower  
95 respiratory tract [15]. Transmission of SARS-CoV-2 among ferrets via either air or direct  
96 contact has been shown recently, where virus was shed in nasal washes, saliva, feces, and  
97 urine of infected animals [16, 17]. Notwithstanding the great importance of rodent and ferret  
98 models, also non-human primates (NHPs) will likely play a pivotal role in COVID-19 research.  
99 Like with SARS-CoV, NHPs are susceptible to infection with human SARS-CoV-2. Due to their  
100 close phylogenetic relationship, NHPs and humans share many immunological and  
101 pathological characteristics [18-20]. This makes NHPs suitable for preclinical evaluation of  
102 vaccines and antiviral or immunomodulatory compounds to combat SARS-CoV-2. So far, five  
103 species of NHPs; rhesus and cynomolgus macaques, common marmosets (*Callithrix jacchus*),  
104 African green monkeys (*Chlorocebus sabaeus*), and sacred baboons (*Papio hamadryas*) have  
105 featured in SARS-CoV-2 studies. Common marmosets, a small New World monkey species, are  
106 susceptible to infection with SARS and MERS coronaviruses [21, 22], but appear to be  
107 relatively resistant to infection with SARS-CoV-2 as only low levels of virus replication could  
108 be measured [23, 24]. African green monkeys presented robust virus replication and also  
109 showed evidence of respiratory disease [25, 26], in contrast to baboons where variable levels  
110 of virus replication were measured [24]. The two most widely-used NHP species in biomedical  
111 research are rhesus macaques and cynomolgus macaques. Both macaque species had already

112 proven their value in research on the related coronaviruses that caused the SARS and MERS  
113 epidemics [27, 28], and thus are considered relevant NHP models for preclinical COVID-19  
114 studies. Cynomolgus macaques have been deployed in studies describing aspects of SARS-  
115 CoV-2 pathogenesis [23, 29, 30], and have been utilized to evaluate the efficacy of  
116 hydroxychloroquine as an antiviral compound [31]. Rhesus macaques have also been applied  
117 in COVID-19 pathogenesis studies [22, 24, 32, 33], and to test the efficacy of remdesivir in the  
118 treatment of SARS-CoV-2 infection [34]. Additionally, several prototype COVID-19 vaccine  
119 candidates have received their first efficacy evaluation in the rhesus macaque model [35-42].  
120 Some research groups [23, 24] shed light on the heterogeneity in SARS-CoV-2 infection and  
121 investigated disease progression in different NHP species. Most of these studies were  
122 conducted by different research teams, and a controlled comparative approach is lacking thus  
123 far.

124 In other NHP disease models, like those developed for AIDS, TB, and influenza research, the  
125 choice of macaque (sub)species can influence the disease outcome considerably [43-47]. The  
126 choice of a specific NHP species for research on a new and complex disease, like COVID-19, is  
127 therefore not a trivial one and the key question which macaque species is best suited to  
128 investigate specific aspects of COVID-19 research needs to be answered. To address this issue,  
129 we compared SARS-CoV-2 replication in rhesus and cynomolgus macaque species and  
130 monitored signs of COVID-19-like disease symptoms for three weeks after infection. The  
131 macaques were infected in parallel with the same virus stock, received completely identical  
132 treatment, and the course of infection was followed using the same analyses, including  
133 monitoring of lung pathology using computed tomography (CT), and continuous telemetric  
134 recording of body temperature and activity of the animals.

135

## 136 **Results**

### 137 **Infection of macaques with SARS-CoV-2**

138 After administration of the virus in the upper trachea and nose, levels of viral RNA were  
139 detectable in the tracheal and nasal swabs of all monkeys at day 1 pi. Viral RNA remained  
140 evident in swab samples for several days. In the tracheal swab sample of rhesus macaque  
141 R14002, viral RNA was first time below the detection time at 10 days pi. (Fig 1A, S1 Table). The  
142 individual variation of SARS-CoV-2 RNA levels detected in the macaques, regardless of species,  
143 was considerable. Peak viral RNA levels in the trachea varied between  $1.7 \times 10^4$  copies/ml  
144 (R15096; day 1 pi) and  $1.8 \times 10^8$  copies/ml (J16017; day 2 pi). The time frame in which viral  
145 genetic material could be detected varied from only one day (R15096; day 1 pi) up to day 10  
146 pi. (animal R14002, RNA in the trachea).

147 Peak viral loads detected in nasal swabs were generally lower than levels observed in the  
148 throat samples and did not exceed  $9.5 \times 10^4$  copies/ml (R15090; day 1 pi). The high virus loads  
149 measured in the first two days post-infection may suggest that some remaining RNA from the  
150 original inoculum was still present. However, in all macaques, viral RNA was also isolated from  
151 nasal swabs at later time points, showing that SARS-CoV-2 was excreted via the nose, and thus  
152 indicative for viral replication. The total viral RNA production over time is shown in Fig 1B.

153 The patterns of viral RNA detection in swabs also varied between individuals. The most  
154 outstanding observation was made for cynomolgus macaque J16017 that was positive in the  
155 nose at day 1 pi, then had no detectable viral RNA for a period of three days, but later the  
156 animal became again positive in the nose swabs for three consecutive days. Other animals  
157 (R15096, J16004, J16012, and Ji40805) also became PCR-positive again after a period of one  
158 or more days characterized by undetectable levels. In the anal swabs, viral genetic material  
159 was rarely detected. Only at a few time points, three macaques tested positive, with a



160 maximum viral RNA load of  $3 \times 10^3$  copies/ml at day 1 pi., namely in cynomolgus macaque  
161 J16017. One animal tested positive for viral RNA in blood at a single time point; R15080 at day  
162 5 pi. (S1 Table). Notably, no significant differences in viral RNA loads were calculated between  
163 the macaque species (Fig 1B).

164

### 165 **Body temperature, activity, clinical symptoms and blood parameters after SARS-CoV-2** 166 **infection**

167 Body temperature and activity of each animal was continuously monitored using a Physiotel  
168 Digital telemetric device during the entire study. Upon infection, elevated body temperatures  
169 were measured in both macaque species, which could be correlated to the episodes of viral  
170 replication in the nose and trachea as was evidenced by qRT-PCR. In Fig 2, we show the body  
171 temperature alterations from the baseline during the study. In both groups of animals, the  
172 body temperature was significantly higher during the first two weeks after infection as  
173 compared to later time points (Fig 2). The temperature curves for the individual animals are  
174 depicted in the supplementary data (S1 Fig). The group of cynomolgus macaques showed  
175 elevated body temperature in the first 8 to 10 days following infection. This is in contrast with  
176 the measurements of the rhesus macaques where no substantial rise in temperature was  
177 measured, except for two animals (R14002 and R15090) that showed a sudden peak in body  
178 temperature of  $0.7^\circ\text{C}$  at day 8 pi.

179 The activity curves measured in the 3-weeks observation period for all individuals are  
180 documented in the S2A Fig. The cumulative activity scores in the first 2 weeks pi. were  
181 compared with activity scores in the last week of the study period (S2B Fig). The paired t-test  
182 illustrated a significantly lower activity in all four rhesus macaques during the first period after

183 infection ( $p=0.0072$ ), while this difference in cynomolgus macaques was less obvious and only  
184 found in 2 out of 4 macaques.

185 We applied a clinical scoring list to enumerate clinical symptoms that may be caused by the  
186 SARS-CoV-2 infection (S2 Table). The cumulative clinical scores per week did not exceed 50 (of  
187 a maximum 490 score per week; data not shown), confirming the absence of serious COVID-  
188 19-related symptoms. However, in the second week of infection, cynomolgus macaques  
189 showed more, but still mild, clinical symptoms than rhesus macaques. This was less evident  
190 during the first and third weeks, probably due to outlier clinical scores of individual animals  
191 (Fig 3).

192 Blood samples were analyzed for changes in cell subsets and in biochemical parameters. These  
193 data were related to a set of normal (standard) values derived from uninfected, healthy  
194 rhesus, and cynomolgus macaques from the same breeding colony. No significant deviations  
195 from the normal values were seen in blood cell subsets of the infected monkeys. C-reactive  
196 protein levels, which are increased in COVID-19 patients with pneumonia [48], were not found  
197 higher in infected macaques. In humans, acute kidney injury has been related to SARS-CoV-2  
198 infection [49, 50], and elevated levels of serum creatinine and blood urea were detected in  
199 10-15% of a cohort of COVID-19 patients [51]. Hence, we measured creatinine and urea levels  
200 in macaque blood samples at days 0, 5, 10, 14, and 22 pi., but did not find evidence of kidney  
201 malfunction in the infected, but otherwise seemingly healthy monkeys. Equally, depending on  
202 the severity of the disease, blood coagulation disorders, like highly elevated D-dimer levels,  
203 have been reported for patients [52, 53], but no elevated D-dimer levels were measured in  
204 either macaque species. Elevated levels of glucose and alanine transferase were measured in  
205 the first week pi. in the blood of most animals, and amylase was increased in one rhesus  
206 macaque, R15080 (S3 Fig).

207

208 **Detection of lung lesions in macaques after SARS-CoV-2 infection.**

209 Chest CTs of the macaques after infection revealed several manifestations of COVID-19 with  
 210 a variable time course and lung involvement (Table 1). The most common lesion types that  
 211 were found in both rhesus and cynomolgus macaques were ground glass opacities (GGO),  
 212 consolidations, and crazy paving patterns (CCP) (Fig 4).

213 **Table 1. CT scores of lung lesions in SARS-CoV-2-infected macaques**

|         |    | Animals |        |        |        |        |        |        |          |
|---------|----|---------|--------|--------|--------|--------|--------|--------|----------|
|         |    | R14002  | R15080 | R15090 | R15096 | J16004 | J16012 | J16017 | Ji408005 |
| Days pi | 0  | 0       | 0      | 0      | 0      | 0      | 0      | 0      | 0        |
|         | 2  | 0       | 1      | 2      | 2      | 2      | 2      | 0      | 0        |
|         | 4  | 0       | 0      | 0      | 2      | 0      | 4      | 0      | 0        |
|         | 6  | 0       | 0      | 0      | 2      | 0      | 5      | 0      | 4        |
|         | 8  | 3       | 0      | 2      | 3      | 0      | 5      | 3      | 2        |
|         | 10 | 2       | 2      | 0      | 2      | 2      | 1      | 3      | 4        |
|         | 12 | 3       | 3      | 0      | 1      | 3      | 1      | 0      | 0        |
|         | 14 | 1       | 2      | 0      | 3      | 1      | 0      | 0      | 2        |
|         | 16 | 0       | 0      | 0      | 4      | 3      | 6      | 2      | 4        |
|         | 22 | 3       | 0      | 0      | 3      | 3      | 6      | 1      | 2        |

214

215 Lung lesions (max. CT score 2/35) were already seen in CTs early after infection on day 2 in 5  
 216 out of 8 monkeys, three rhesus, and two cynomolgus macaques. Thereafter, lung involvement  
 217 was seen in most animals and CT scores increased. Around days 8 and 10 pi., lung lesions were  
 218 manifest in all animals, and in several macaques the coverage had increased (Table 1). Again,  
 219 individual variations in lung pathology were considerable; for instance, rhesus macaque  
 220 R15090 showed low CT scores of 2 only at days 2 and 8 pi, while rhesus macaque R15096 had  
 221 positive CT scores at all time points after experimental infection, varying from 1 to 4.  
 222 Cynomolgus macaque J16012 suffered from serious lung damage as early as day 4 pi (score 5)  
 223 and had a positive chest CT at 8 out of 9 time points. In Fig 5, the cumulative CT scores over

224 the monitoring period are depicted. The increase in cumulative CT score was 0.692 points per  
225 day (95% CI 0.657 to 0.726) and no difference was observed between rhesus and cynomolgus  
226 macaques ( $P = 0.2708$ ).

227

## 228 **Immune response to SARS-CoV-2 infection**

229 Humoral immune responses developed relatively fast after infection (Fig 6 and S4 Fig). Total  
230 immunoglobulin (Ig) in serum was detected by the DR-ELISA. The antibody response directed  
231 to the nucleoprotein (N) of SARS-CoV-2 became evident between day 10 and 12 pi., and  
232 continued to rise thereafter, but with individual variations in total Ig levels and patterns. While  
233 Ig levels in several animals, both rhesus and cynomolgus macaques, continued to rise until day  
234 21 pi., the Ig levels in others already showed first signs of a decline at day 17 pi. The total Ig  
235 pattern seen in the sera of all macaques was reflected by the measurement of IgG directed to  
236 the N protein in the same sera. Notably, the development of IgM titers was barely detected  
237 in the longitudinal serum samples. In sera from only one animal, cynomolgus macaque  
238 J106012, IgM was detectable, beginning at day 12 pi. but titers already started to decline to  
239 baseline levels at the end of the study at day 22 pi.

240

## 241 **Cytokine and chemokine measurements**

242 Serum levels of 13 cytokines and chemokines were measured to examine the nature of the  
243 inflammatory response triggered by the infection with SARS-CoV-2. We investigated if any  
244 species differences could be distinguished in the inflammatory response to infection. All  
245 metadata obtained from the individual animals are depicted in S5 Fig. Directly upon infection,  
246 IP-10 and MCP-1 levels peaked in sera of all cynomolgus macaques. The IP-10 peak at day 2  
247 pi. quickly returned to baseline values. In contrast, in rhesus macaques, only a minor rise in

248 IP-10 levels was observed at the same time interval. In the same time span, but in both  
249 macaque species, the levels of chemokine MCP-1 (CCL2) increased. Levels of other  
250 chemokines, like eotaxin (CCL11), MIP-1 $\alpha$  (CCL3), MIP-1 $\beta$  (CCL4), but also the cytokines IL-6  
251 and IFN- $\gamma$  dropped in the first week after infection and started rising around two weeks pi.  
252 This decline of particular serum cytokine and chemokine levels coincided with the time period  
253 that viral RNA was detectable in nasal and tracheal swabs, indicative for virus production. A  
254 different pattern was seen for RANTES (CCL5) and TNF $\alpha$  proteins; serum levels were high in  
255 the first 2 weeks after infection and then started decreasing to undetectable levels. RANTES  
256 serum concentrations also showed an initial drop very early after infection. This was most  
257 prominent in the cynomolgus macaques where RANTES levels dropped to zero on day 1 pi.  
258 and started to increase at day 6 pi. Post-infection levels of I-TAC (CXCL11), MIG (CXCL9), and  
259 IL-8 (CXCL8) were below detection or were not influenced by the SARS-CoV-2 infection.

260

## 261 **Discussion**

262 In humans, COVID-19 was initially regarded as a respiratory disease, but now it is clear that  
263 individuals that succumb to this disease can display a complex array of pathologies that cover  
264 a broad spectrum of symptoms. To sort out the factors leading to the different COVID-19  
265 manifestations, animal models are essential. Due to their similarity to humans, specifically,  
266 non-human primates can play a pivotal role in this type of preclinical research. To best  
267 appreciate the potential of the various macaque species as SARS-CoV-2 infection models, a  
268 thorough characterization of the course of infection is needed. The comparative study  
269 reported in this communication contributes to the knowledge, but more importantly validates  
270 the macaque models that are currently in use in SARS-CoV-2 research.

271 Unlike in some human patients, we found no evidence for renal involvement or coagulation  
272 disorders in our monkeys. Equally, increasing C-reactive protein (CRP) levels are a marker in  
273 the early diagnosis of pneumonia [48], but different from humans; these levels were not  
274 subject to change in the infected macaques during the 3-weeks monitoring period. A direct  
275 comparison with humans is hampered by the fact that the macaques were infected, but  
276 seemingly healthy, while most published findings in humans were obtained from COVID-19  
277 patients in various stages of disease. Unbiased measurement of the body temperature and  
278 activity of each animal was done using a telemetric device implanted in the abdomen.  
279 Monitoring by telemetry is an important asset as in both macaque species a notable difference  
280 in body temperature was recorded in the first 2 weeks (period of active virus replication) as  
281 compared to the third week. Significant differences in animal activity indicated that SARS-CoV-  
282 2 infection also influenced the well-being of the animals without causing obvious clinical  
283 symptoms. Notably, the elevation in body temperature on the first day of infection, as was  
284 reported by Munster *et al.*, was not seen in our study, possibly pointing to a potential  
285 difference in the sampling method. While we used 24/7 monitoring, in the study described by  
286 Munster *et al.*, temperature was measured only on selected days on anesthetized animals  
287 [54]. However, variation can also be due to a difference between the challenge viruses used,  
288 the methods used for virus inoculation, or the origin and adaptation of the animals used.  
289 Antibody responses were detectable in all animals after infection. Interestingly, no IgM was  
290 detected in 7 out of 8 animals. This result was confirmed by a second, in-house developed  
291 IgM-ELISA, but instead, the SARS-CoV-2 S protein was used as coating antigen. This approach  
292 excludes a technical flaw in the serological assay used. We cannot explain the lack of IgM  
293 response to infection, but similar observations were made in an infection study using African  
294 Green monkeys. Hartman *et al.* did detect IgM, but the titers were very low, not exceeding

295 1Log<sub>10</sub> above the assay limit of detection [26]. In contrast, the development of IgG accurately  
296 followed the course of virus infection, as it became first detectable within one week after the  
297 virus had become undetectable in sera by RT-PCR. This was in line with findings of others [25,  
298 26, 29].

299 In a subset of COVID-19 patients, the acute respiratory syndrome coincides with a ‘cytokine  
300 storm’ or hypercytokinemia, which eventually can result in multi-organ failure [55]. Patients  
301 with severe COVID-19 symptoms on intensive care units had significantly elevated plasma  
302 levels of proinflammatory cytokines, like IL-2, IL-7, IL-10, GSCF, IP-10, MCP-1, MIP-1 $\alpha$ , and TNF-  
303  $\alpha$  [56]. In this study, macaques did not show overt disease symptoms of COVID-19, but certain  
304 cytokines, like IL-6, IFN- $\gamma$ , MIP-1 $\alpha$ , and MIP-1 $\beta$  increased in the plasma of both macaque  
305 species, indicating the involvement of the chemokine system during SARS-CoV-2 infection.  
306 The cytokine profiles after SARS-CoV-2 were highly comparable between species, except for  
307 IP-10 and MCP-1, suggesting differential involvement of monocyte activation between the  
308 two species. The similarity in cytokine response after SARS-CoV-2 infection contrasts with  
309 observations made after infection of macaques with another respiratory virus, pandemic  
310 H1N1 influenza [47]. In that study, macaque species-specific cytokine responses (IL-6, MCP-1,  
311 IL-15, IL-1Ra, MIP-1 $\alpha$ , and IL-8) were induced upon infection with pH1N1, highlighting the virus  
312 type-specific reaction of the chemokine system.

313 Unlike most published studies, we decided not to conduct a necropsy on animals early, 4-5  
314 days, post-infection. At that time point after infection, evidence was found for acute viral  
315 interstitial pneumonia [30, 32, 34, 54]. Instead, we performed CT imaging to visualize lung  
316 pathology induced by SARS-CoV-2. In humans, the sensitivity of CT scanning for lung pathology  
317 is high (positive predictive value of 92%), but the type of lesions found are not COVID-19-  
318 specific, and can also be observed in a number of other infectious and non-infectious diseases

319 [57, 58]. In this study, we used purpose-bred NHPs with a well-documented health status and  
320 we could compare the scans with a CT obtained just before infection. Therefore, CT imaging  
321 provides a valuable tool to specifically monitor the progression of COVID-19-related lung  
322 pathology during the entire course of the study. Based on the criteria set to determine clinical  
323 severity [59], the macaques in our panel featured moderate disease levels as all eight  
324 individuals show levels of pneumonia. In another study using only cynomolgus macaques and  
325 using CT imaging as well, lesions were found as early as 2 days post-infection in infected  
326 animals [29]. Type-wise, the lung lesions described in that report were comparable to the ones  
327 in this communication, but they tend to be located deeper in the lungs. An explanation for  
328 this difference may be that the method of instillation of the virus is the underlying cause. Finch  
329 *et al.* administered the virus into each bronchus by direct bilateral primary post-carinal  
330 intrabronchial instillation, whereas we applied the virus relatively high in the trachea, just  
331 below the vocal cords. For similar reasons as reported by the same research team [29], we did  
332 not collect bronchoalveolar lavage (BAL) samples from our animals to avoid unwanted  
333 interventions in the natural infection process caused by SARS-CoV-2. Studies performed at our  
334 institute with respiratory viruses have shown that lung lavages can indeed significantly  
335 influence the infection process (manuscript in preparation). Instead of BAL samples, we  
336 collected tracheal swabs for virological analysis. The viral RNA loads, but also the temporal  
337 pattern of detection in swabs samples were like those observed in BAL samples from other  
338 studies [22, 24, 34, 38]. This demonstrates that tracheal swabs are a good alternative for BAL  
339 sampling. In addition, the collection of tracheal swabs is a less invasive technique that causes  
340 relatively minor discomfort to the animals.

341 In most SARS-CoV-2 studies in non-human primates, the animals are euthanized shortly after  
342 infection in the first week, or after a period of 3 weeks. The animals from this study were not



343 euthanized to be able to perform re-infection studies or to monitor them for late clinical signs,  
344 or co-morbidities related to COVID-19.

345 We conclude that the course of SARS-CoV-2 infection of both macaque species is highly  
346 similar, indicating that they are equally suitable models to test vaccines and antivirals in a  
347 preclinical setting for safety and efficacy. The macaque model for SARS-CoV-2 infection in  
348 humans manifests important virological aspects of this disease in humans. Given their  
349 immunological and physiological resemblance to humans, NHPs likely will continue to play a  
350 pivotal role in research for both COVID-19 prophylactic and therapeutic treatments.

351

## 352 **Materials and Methods**

### 353 **Ethics and Biosafety Statement**

354 All housing and animal care procedures took place at the Biomedical Primate Research Centre  
355 (BPRC) in Rijswijk, the Netherlands. The BPRC is accredited by the American Association for  
356 Accreditation of Laboratory Animal Care (AAALAC) International and is compliant with  
357 European directive 2010/63/EU as well as the “Standard for Humane Care and Use of  
358 Laboratory Animals by Foreign Institutions” provided by the Department of Health and Human  
359 Services of the US National Institutes of Health (NIH, identification number A5539-01). Upon  
360 positive advice by the independent ethics committee (DEC-BPRC) the competent authorities  
361 (CCD, Central Committee for Animal Experiments) issued a project license (license  
362 AVD5020020209404). Approval to start was obtained after further assessment of the detailed  
363 study protocol by the institutional animal welfare body (AWB) (in Dutch: Instantie voor  
364 Dierenwelzijn, IvD). All animal handlings were performed within the Department of Animal  
365 Science (ASD) according to Dutch law. ASD is regularly inspected by the responsible national  
366 authority (Nederlandse Voedsel- en Warenautoriteit, NVWA), and the AWB.

367

368 **Animals**

369 Four Indian-origin rhesus macaques and four cynomolgus macaques were used in this study  
370 (S3 Table). All macaques were mature, outbred animals, purpose-bred, and housed at the  
371 BPRC. The animals were in good physical health with normal baseline biochemical and  
372 hematological values. All were pair-housed with a socially compatible cage-mate in cages of  
373 at least 4 m<sup>3</sup> with bedding to allow foraging and were kept on a 12-hour light/dark cycle. The  
374 monkeys were offered a daily diet consisting of monkey food pellets (Ssniff, Soest, Germany)  
375 supplemented with vegetables and fruit. Enrichment was provided daily in the form of pieces  
376 of wood, mirrors, food puzzles, and a variety of other homemade or commercially available  
377 enrichment products. Drinking water was available *ad libitum* via an automatic watering  
378 system. Animal Care staff provided daily visual health checks before infection, and twice-daily  
379 after infection. The animals were monitored for appetite, general behavior, and stool  
380 consistency. All possible precautions were taken to ensure the welfare and to avoid any  
381 discomfort to the animals. All experimental interventions (intratracheal and intranasal  
382 infection, swabs, blood samplings, and CT scans) were performed under anesthesia.

383

384 **Virus stock**

385 The animals were infected with the SARS-CoV-2 strain BetaCoV/BavPat1/2020. This strain was  
386 isolated from a patient who traveled from China to Germany, and an aliquot of a Vero E6 cell  
387 culture was made available through the European Virus Archive-Global (EVAg). The viral stock  
388 for the infection study was propagated on Vero E6 cells. For this study, a fifth passage virus  
389 stock was prepared with a titer of  $3.2 \times 10^6$  TCID<sub>50</sub> per ml. The integrity of the virus stock was  
390 confirmed by sequence analysis.

391

392 **Experimental infections and post-exposure study follow-up**

393 Three weeks before the experimental infection, a Physiotel Digital device (DSI Implantable  
394 Telemetry, Data Sciences International, Harvard Bioscience, UK) was implanted in the  
395 abdominal cavity of each animal. This device allowed the continuous real-time measurement  
396 of the body temperature and the animals' activity remotely using telemetry throughout the  
397 study.

398 At day 0, all animals were exposed to a dose of  $1 \times 10^6$  TCID<sub>50</sub> of SARS-CoV-2, diluted in 5 ml  
399 phosphate buffered saline (PBS). The virus was inoculated via a combination of the  
400 intratracheal route (4.5 ml) and intranasal route (0.25 ml per nostril). Virus infection was  
401 monitored for 22 days, during which period the animals were checked twice-daily by the  
402 animal caretakers and scored for clinical symptoms according to a previously published,  
403 adapted scoring system [60] (S2 Table). A numeric score of 35 or more per observation time  
404 point was predetermined to serve as an endpoint and justification for euthanasia. Every time  
405 an animal was sedated, the body weight was measured. Blood was collected using standard  
406 aseptic methods from the femoral vein at regular time points post-infection (pi). In parallel,  
407 tracheal, nasal, and anal swabs were collected using Copan FLOQSwabs (MLS, Menen,  
408 Belgium). Swabs were placed in 1 ml DMEM, supplemented with 0.5% bovine serum albumin  
409 (BSA), fungizone (2.5 µg/ml), penicillin (100 U/ml), and streptomycin (100 µg/ml) and directly  
410 transported to the BSL3 lab.

411

412 **Biochemistry and hematology analysis**

413 Clinical biochemistry was performed using a Vetscan VS2 Chemical analyzer (Zoetis Benelux,  
414 Capelle aan de IJssel, The Netherlands) with the use of the Comprehensive Diagnostic profile.

415 This profile allows testing for alanine aminotransferase, albumin, alkaline phosphatase,  
416 amylase, calcium, creatinine, globulin, glucose, phosphorus, potassium, sodium, total  
417 bilirubin, total protein, and blood urea nitrogen. Hematology was performed using a Vetscan  
418 HM5 Hematology analyser (Zoetis Benelux, Capelle aan de IJssel, The Netherlands). C-reactive  
419 protein and D-dimer levels were measured using Cobas Integra 400 plus analyzer (Roche  
420 Diagnostics Nederland B.V.).

421

#### 422 **Viral RNA detection**

423 Viral RNA was isolated from plasma and swab sample supernatants using a QIAamp Viral RNA  
424 Mini kit (Qiagen Benelux BV, Venlo, The Netherlands) following the manufacturer's  
425 instructions. Viral RNA was reverse-transcribed to cDNA using a Transcriptor First Strand cDNA  
426 Synthesis kit (Roche Diagnostics BV, Almere, The Netherlands). Viral RNA was quantified by  
427 real-time quantitative RT-PCR specific for the RdRp gene of SARS-CoV-2, as described by  
428 Corman *et al.* [61]. The lower detection limit of the qRT-PCR was 3.6 viral RNA copies per  
429 reaction.

430

#### 431 **Computed tomography**

432 Computed tomography (CT) data were acquired on several time points until day 22 (D0, 2, 4,  
433 6, 8, 10, 12, 14, 16, 22 post-infection) using a MultiScan Large Field of View Extreme Resolution  
434 Research Imager (LFER) 150 PET-CT (Mediso Medical Imaging Systems Ltd., Budapest,  
435 Hungary). Animals were sedated with ketamine (10 mg/kg ketamine hydrochloride (Alfasan  
436 Nederland BV, Woerden, The Netherlands) combined with medetomidine hydrochloride, 0.05  
437 mg/kg (Sedastart; AST Farma B.V., Oudewater, The Netherlands) to induce sedation and  
438 muscle relaxation, both applied intramuscularly (IM). The monkeys were positioned head first

439 supine (HFS) with the arms up and fixated in a vacuum pillow. A single CT of the thorax takes  
440 35 seconds by which respiratory motion is inevitable, therefore, to mitigate the impact of  
441 respiratory motion and improve the image quality, respiratory gating was applied. The  
442 respiratory amplitude was detected with a gating pad placed next to the belly button. At the  
443 end of the procedure, when the macaques returned to their home cage, atipamezole  
444 (Sedastop; AST Farma B.V., Oudewater, The Netherlands) was given IM (0.25 mg/kg).  
445 For the final reconstruction, the expiration phases were exclusively used and manually  
446 selected. A semi-quantitative scoring system for chest CT evaluation was used to estimate  
447 SARS-CoV-2-induced lung disease [29, 62]. Quantification of the CTs was performed  
448 independently by two persons based on the sum of the lobar scores. The degree of  
449 involvement in each zone was scored as: 0 for no involvement, 1 for <5%, 2 for 5-24%, 3 for  
450 25-49%, 4 for 50-74% and 5 for  $\geq$ 75% involvement. An additional increase or decrease of 0.5  
451 was used to indicate alterations in CT density of the lesions. By using this scoring system, a  
452 maximum score of 35 could be reached for the combined lobes per time point.

453

#### 454 **Assessment of cytokine and chemokine protein levels in serum**

455 Cytokine and chemokine concentrations in sera of infected macaques, including IL-1 $\beta$ , IL-6,  
456 CCL11 (Eotaxin), CXCL10 (IP-10), CXCL11 (I-TAC), CCL2 (MCP-1), CXCL9 (MIG), CCL3 (MIP-1 $\alpha$ ),  
457 CCL4 (MIP-1 $\beta$ ), CCL5 (RANTES), CXCL8 (IL-8), TNF $\alpha$ , and IFN $\gamma$ , were determined using  
458 LEGENDplex™ NHP Chemokine/Cytokine Panel (13-plex) (Biolegend, San Diego, CA, USA)  
459 according to manufacturer's instruction. Samples were measured on an LSRII FACS machine  
460 and analyzed by using company software.

461

#### 462 **Antibody response**

463 The total antibody response in macaque sera was analyzed in a double recognition enzyme-  
464 linked immunosorbent assay (DR-ELISA) that detects total immunoglobulins in serum and  
465 targeted to the SARS-CoV-2 nucleoprotein (N) protein as described by Hoste *et al.* [63]  
466 (INgezim COVID19 DR; Eurofins-INGENASA, Madrid, Spain). Additionally, two in-house indirect  
467 ELISAs were used to detect monkey immunoglobulin G (IgG) and immunoglobulin M (IgM)  
468 directed to SARS-CoV-2 N protein. Briefly, Corning® 96-Well High-Binding Flat-Bottom  
469 Microplates were coated with N protein and incubated overnight at 4°C in carbonate buffer,  
470 pH 9.6. After washing the wells with PBS pH 7.4/0.05% Tween 20 (PBST), a blocking step was  
471 performed with StabilZyme® SELECT Stabilizer (SurModics, Inc., Eden Prairie, MN, USA) for 1h  
472 at room temperature (RT). The plate was then incubated with serum samples diluted 1:100 in  
473 PBST with 2.5% fetal bovine serum (Gibco; Thermo Fisher Scientific, Inc., Waltham, MA, USA)  
474 for 1h at RT. Two positive, cut-off, and negative controls were added to each plate. For  
475 macaque-IgG detection, the wells were washed as described above and incubated with  
476 Peroxidase-conjugated AffiniPure Goat Anti-Human IgG, Fcγ Fragment Specific (Jackson  
477 ImmunoResearch Laboratories, Inc., PA, USA) diluted 1:25 000 in StabilZyme® HRP Conjugate  
478 Stabilizer (SurModics), supplemented with 0.5M NaCl for 1h at RT. Finally, after a washing  
479 step, the plate was incubated for 15 min with the substrate (TMB-MAX, Neogen Corporation,  
480 Lexington, KY, USA) and the reaction was stopped by addition of 0.5 M sulfuric acid. The  
481 absorbance was measured at 450 nm using a SpectraMax M5 plate reader (Molecular Devices,  
482 LLC., San Jose, CA, USA). To detect macaque-IgM, the same protocol was followed, but the  
483 secondary antibody used was an anti-Monkey IgM (μ-chain specific)-Peroxidase antibody  
484 produced in goat (Sigma-Aldrich, Merck KGaA, MI, USA) at 1:5000 dilution.

485

## 486 **Acknowledgements**

487 We would like to thank the Animal Science Department, especially the animal caretakes and  
488 veterinarians for excellent care of the animals. We also thank Cristina Aira (Eurofins Ingenasa,  
489 Madrid) for technical assistance.  
490

491 **References:**

492

- 493 1. Chan JF, Yuan S, Kok KH, To KK, Chu H, Yang J, et al. A familial cluster of pneumonia  
494 associated with the 2019 novel coronavirus indicating person-to-person transmission: a study  
495 of a family cluster. *Lancet*. 2020;395(10223):514-23. Epub 2020/01/28. doi: 10.1016/S0140-  
496 6736(20)30154-9. PubMed PMID: 31986261; PubMed Central PMCID: PMC7159286.
- 497 2. Hoffmann M, Kleine-Weber H, Schroeder S, Kruger N, Herrler T, Erichsen S, et al. SARS-  
498 CoV-2 Cell Entry Depends on ACE2 and TMPRSS2 and Is Blocked by a Clinically Proven Protease  
499 Inhibitor. *Cell*. 2020;181(2):271-80 e8. Epub 2020/03/07. doi: 10.1016/j.cell.2020.02.052.  
500 PubMed PMID: 32142651; PubMed Central PMCID: PMC7102627.
- 501 3. Hamming I, Timens W, Bulthuis ML, Lely AT, Navis G, van Goor H. Tissue distribution of  
502 ACE2 protein, the functional receptor for SARS coronavirus. A first step in understanding SARS  
503 pathogenesis. *J Pathol*. 2004;203(2):631-7. Epub 2004/05/14. doi: 10.1002/path.1570.  
504 PubMed PMID: 15141377; PubMed Central PMCID: PMC7167720.
- 505 4. Verity R, Okell LC, Dorigatti I, Winskill P, Whittaker C, Imai N, et al. Estimates of the  
506 severity of coronavirus disease 2019: a model-based analysis. *Lancet Infect Dis*.  
507 2020;20(6):669-77. Epub 2020/04/03. doi: 10.1016/S1473-3099(20)30243-7. PubMed PMID:  
508 32240634; PubMed Central PMCID: PMC7158570.
- 509 5. Berlin DA, Gulick RM, Martinez FJ. Severe Covid-19. *N Engl J Med*. 2020. Epub  
510 2020/05/16. doi: 10.1056/NEJMc2009575. PubMed PMID: 32412710.
- 511 6. Han C, Duan C, Zhang S, Spiegel B, Shi H, Wang W, et al. Digestive Symptoms in COVID-  
512 19 Patients With Mild Disease Severity: Clinical Presentation, Stool Viral RNA Testing, and  
513 Outcomes. *Am J Gastroenterol*. 2020;115(6):916-23. Epub 2020/04/18. doi:  
514 10.14309/ajg.0000000000000664. PubMed PMID: 32301761; PubMed Central PMCID:  
515 PMC7172493.
- 516 7. Paterson RW, Brown RL, Benjamin L, Nortley R, Wiethoff S, Bharucha T, et al. The  
517 emerging spectrum of COVID-19 neurology: clinical, radiological and laboratory findings.  
518 *Brain*. 2020. Epub 2020/07/09. doi: 10.1093/brain/awaa240. PubMed PMID: 32637987;  
519 PubMed Central PMCID: PMC7454352.
- 520 8. Puntmann VO, Carerj ML, Wieters I, Fahim M, Arendt C, Hoffmann J, et al. Outcomes  
521 of Cardiovascular Magnetic Resonance Imaging in Patients Recently Recovered From  
522 Coronavirus Disease 2019 (COVID-19). *JAMA Cardiol*. 2020. Epub 2020/07/31. doi:  
523 10.1001/jamacardio.2020.3557. PubMed PMID: 32730619; PubMed Central PMCID:  
524 PMC7385689.
- 525 9. Peiris JS, Lai ST, Poon LL, Guan Y, Yam LY, Lim W, et al. Coronavirus as a possible cause  
526 of severe acute respiratory syndrome. *Lancet*. 2003;361(9366):1319-25. Epub 2003/04/25.  
527 doi: 10.1016/S0140-6736(03)13077-2. PubMed PMID: 12711465; PubMed Central PMCID:  
528 PMC7112372.
- 529 10. McCray PB, Jr., Pewe L, Wohlford-Lenane C, Hickey M, Manzel L, Shi L, et al. Lethal  
530 infection of K18-hACE2 mice infected with severe acute respiratory syndrome coronavirus. *J  
531 Virol*. 2007;81(2):813-21. Epub 2006/11/03. doi: 10.1128/JVI.02012-06. PubMed PMID:  
532 17079315; PubMed Central PMCID: PMC1797474.
- 533 11. Lutz C, Maher L, Lee C, Kang W. COVID-19 preclinical models: human angiotensin-  
534 converting enzyme 2 transgenic mice. *Hum Genomics*. 2020;14(1):20. Epub 2020/06/06. doi:



- 535 10.1186/s40246-020-00272-6. PubMed PMID: 32498696; PubMed Central PMCID:  
536 PMCPMC7269898.
- 537 12. Sanchez Felipe L, Vercruyssen T, Sharma S, Ma J, Lemmens V, van Looveren D, et al. A  
538 single-dose live-attenuated YF17D-vectored SARS-CoV2 vaccine candidate. *Nature*. 2020 (*in*  
539 *press*).
- 540 13. Boudewijns R, Thibaut HJ, Kaptein SJF, Li R, Vergote V, Seldeslachts L, et al. STAT2  
541 signaling as double-edged sword restricting viral dissemination but driving severe pneumonia  
542 in SARS-CoV-2 infected hamsters. *bioRxiv*. 2020.
- 543 14. Enkirch T, von Messling V. Ferret models of viral pathogenesis. *Virology*. 2015;479-  
544 480:259-70. Epub 2015/03/31. doi: 10.1016/j.virol.2015.03.017. PubMed PMID: 25816764;  
545 PubMed Central PMCID: PMCPMC7111696.
- 546 15. Martina BE, Haagmans BL, Kuiken T, Fouchier RA, Rimmelzwaan GF, Van Amerongen  
547 G, et al. *Virology: SARS virus infection of cats and ferrets*. *Nature*. 2003;425(6961):915. Epub  
548 2003/10/31. doi: 10.1038/425915a. PubMed PMID: 14586458; PubMed Central PMCID:  
549 PMCPMC7094990.
- 550 16. Kim YI, Kim SG, Kim SM, Kim EH, Park SJ, Yu KM, et al. Infection and Rapid Transmission  
551 of SARS-CoV-2 in Ferrets. *Cell Host Microbe*. 2020. Epub 2020/04/08. doi:  
552 10.1016/j.chom.2020.03.023  
553 10.1016/j.chom.2020.03.023. PubMed PMID: 32259477.
- 554 17. Richard M, Kok A, de Meulder D, Bestebroer TM, Lamers MM, Okba NMA, et al. SARS-  
555 CoV-2 is transmitted via contact and via the air between ferrets. *Nat Commun*.  
556 2020;11(1):3496. Epub 2020/07/10. doi: 10.1038/s41467-020-17367-2. PubMed PMID:  
557 32641684; PubMed Central PMCID: PMCPMC7343828.
- 558 18. Matute-Bello G, Frevert CW, Martin TR. Animal models of acute lung injury. *Am J*  
559 *Physiol Lung Cell Mol Physiol*. 2008;295(3):L379-99. Epub 2008/07/16. doi:  
560 10.1152/ajplung.00010.2008. PubMed PMID: 18621912; PubMed Central PMCID:  
561 PMCPMC2536793.
- 562 19. Estes JD, Wong SW, Brenchley JM. Nonhuman primate models of human viral  
563 infections. *Nat Rev Immunol*. 2018;18(6):390-404. Epub 2018/03/21. doi: 10.1038/s41577-  
564 018-0005-7. PubMed PMID: 29556017; PubMed Central PMCID: PMCPMC5970954.
- 565 20. Cleary SJ, Pitchford SC, Amison RT, Carrington R, Robaina Cabrera CL, Magnen M, et al.  
566 Animal models of mechanisms of SARS-CoV-2 infection and COVID-19 pathology. *Br J*  
567 *Pharmacol*. 2020. Epub 2020/05/29. doi: 10.1111/bph.15143. PubMed PMID: 32462701;  
568 PubMed Central PMCID: PMCPMC7283621.
- 569 21. Greenough TC, Carville A, Coderre J, Somasundaran M, Sullivan JL, Luzuriaga K, et al.  
570 Pneumonitis and multi-organ system disease in common marmosets (*Callithrix jacchus*)  
571 infected with the severe acute respiratory syndrome-associated coronavirus. *Am J Pathol*.  
572 2005;167(2):455-63. Epub 2005/07/29. doi: 10.1016/S0002-9440(10)62989-6. PubMed PMID:  
573 16049331; PubMed Central PMCID: PMCPMC1603565.
- 574 22. Yu P, Xu Y, Deng W, Bao L, Huang L, Xu Y, et al. Comparative pathology of rhesus  
575 macaque and common marmoset animal models with Middle East respiratory syndrome  
576 coronavirus. *PLoS One*. 2017;12(2):e0172093. Epub 2017/02/25. doi:  
577 10.1371/journal.pone.0172093. PubMed PMID: 28234937; PubMed Central PMCID:  
578 PMCPMC5325479.
- 579 23. Lu S, Zhao Y, Yu W, Yang Y, Gao J, Wang J, et al. Comparison of nonhuman primates  
580 identified the suitable model for COVID-19. *Signal Transduct Target Ther*. 2020;5(1):157. Epub

- 581 2020/08/21. doi: 10.1038/s41392-020-00269-6. PubMed PMID: 32814760; PubMed Central  
582 PMCID: PMCPMC7434851.
- 583 24. Singh A, Singh RS, Sarma P, Batra G, Joshi R, Kaur H, et al. A Comprehensive Review of  
584 Animal Models for Coronaviruses: SARS-CoV-2, SARS-CoV, and MERS-CoV. *Viol Sin.*  
585 2020;35(3):290-304. Epub 2020/07/02. doi: 10.1007/s12250-020-00252-z. PubMed PMID:  
586 32607866; PubMed Central PMCID: PMCPMC7324485.
- 587 25. Woolsey C, Borisevich V, Prasad AN, Agans KN, Deer DJ, Dobias NS, et al. Establishment  
588 of an African green monkey model for COVID-19. *bioRxiv.* 2020. Epub 2020/06/09. doi:  
589 10.1101/2020.05.17.100289. PubMed PMID: 32511377; PubMed Central PMCID:  
590 PMCPMC7263506.
- 591 26. Hartman AL, Nambulli S, McMillen CM, White AG, Tilston-Lunel NL, Albe JR, et al. SARS-  
592 CoV-2 infection of African green monkeys results in mild respiratory disease discernible by  
593 PET/CT imaging and shedding of infectious virus from both respiratory and gastrointestinal  
594 tracts. *PLoS Pathog.* 2020;16(9):e1008903. Epub 2020/09/19. doi:  
595 10.1371/journal.ppat.1008903. PubMed PMID: 32946524.
- 596 27. Gong SR, Bao LL. The battle against SARS and MERS coronaviruses: Reservoirs and  
597 Animal Models. *Animal Model Exp Med.* 2018;1(2):125-33. Epub 2019/03/21. doi:  
598 10.1002/ame2.12017  
599 10.1002/ame2.12017. eCollection 2018 Jun. PubMed PMID: 30891557.
- 600 28. Sutton TC, Subbarao K. Development of animal models against emerging  
601 coronaviruses: From SARS to MERS coronavirus. *Virology.* 2015;479-480:247-58. Epub  
602 2015/03/21. doi: 10.1016/j.virol.2015.02.030  
603 10.1016/j.virol.2015.02.030. Epub 2015 Mar 16. PubMed PMID: 25791336.
- 604 29. Finch CL, Crozier I, Lee JH, Byrum R, Cooper TK, Liang J, et al. Characteristic and  
605 quantifiable COVID-19-like abnormalities in CT- and PET/CT-imaged lungs of SARS-CoV-2-  
606 infected crab-eating macaques (*Macaca fascicularis*). *bioRxiv.* 2020. Epub 2020/06/09. doi:  
607 10.1101/2020.05.14.096727. PubMed PMID: 32511338; PubMed Central PMCID:  
608 PMCPMC7241101.
- 609 30. Rockx B, Kuiken T, Herfst S, Bestebroer T, Lamers MM, Oude Munnink BB, et al.  
610 Comparative pathogenesis of COVID-19, MERS, and SARS in a nonhuman primate model.  
611 *Science.* 2020;368(6494):1012-5. Epub 2020/04/19. doi: 10.1126/science.abb7314. PubMed  
612 PMID: 32303590; PubMed Central PMCID: PMCPMC7164679.
- 613 31. Maisonnasse P, Guedj J, Contreras V, Behillil S, Solas C, Marlin R, et al.  
614 Hydroxychloroquine use against SARS-CoV-2 infection in non-human primates. *Nature.* 2020.  
615 Epub 2020/07/23. doi: 10.1038/s41586-020-2558-4. PubMed PMID: 32698191.
- 616 32. Chandrashekar A, Liu J, Martinot AJ, McMahan K, Mercado NB, Peter L, et al. SARS-  
617 CoV-2 infection protects against rechallenge in rhesus macaques. *Science.*  
618 2020;369(6505):812-7. Epub 2020/05/22. doi: 10.1126/science.abc4776. PubMed PMID:  
619 32434946; PubMed Central PMCID: PMCPMC7243369.
- 620 33. Deng W, Bao L, Gao H, Xiang Z, Qu Y, Song Z, et al. Ocular conjunctival inoculation of  
621 SARS-CoV-2 can cause mild COVID-19 in rhesus macaques. *Nat Commun.* 2020;11(1):4400.  
622 Epub 2020/09/04. doi: 10.1038/s41467-020-18149-6. PubMed PMID: 32879306.
- 623 34. Williamson BN, Feldmann F, Schwarz B, Meade-White K, Porter DP, Schulz J, et al.  
624 Clinical benefit of remdesivir in rhesus macaques infected with SARS-CoV-2. *Nature.*  
625 2020;585(7824):273-6. Epub 2020/06/10. doi: 10.1038/s41586-020-2423-5. PubMed PMID:  
626 32516797; PubMed Central PMCID: PMCPMC7486271.

- 627 35. van Doremalen N, Lambe T, Spencer A, Belij-Rammerstorfer S, Purushotham JN, Port  
628 JR, et al. ChAdOx1 nCoV-19 vaccine prevents SARS-CoV-2 pneumonia in rhesus macaques.  
629 Nature. 2020. Epub 2020/07/31. doi: 10.1038/s41586-020-2608-y. PubMed PMID: 32731258.
- 630 36. Gao Q, Bao L, Mao H, Wang L, Xu K, Yang M, et al. Development of an inactivated  
631 vaccine candidate for SARS-CoV-2. Science. 2020;369(6499):77-81. Epub 2020/05/08. doi:  
632 10.1126/science.abc1932. PubMed PMID: 32376603; PubMed Central PMCID:  
633 PMC7202686.
- 634 37. Erasmus JH, Khandhar AP, O'Connor MA, Walls AC, Hemann EA, Murapa P, et al. An  
635 Alphavirus-derived replicon RNA vaccine induces SARS-CoV-2 neutralizing antibody and T cell  
636 responses in mice and nonhuman primates. Sci Transl Med. 2020;12(555). Epub 2020/07/22.  
637 doi: 10.1126/scitranslmed.abc9396. PubMed PMID: 32690628; PubMed Central PMCID:  
638 PMC7402629.
- 639 38. Mercado NB, Zahn R, Wegmann F, Loos C, Chandrashekar A, Yu J, et al. Single-shot  
640 Ad26 vaccine protects against SARS-CoV-2 in rhesus macaques. Nature. 2020. Epub  
641 2020/07/31. doi: 10.1038/s41586-020-2607-z. PubMed PMID: 32731257.
- 642 39. Yu J, Tostanoski LH, Peter L, Mercado NB, McMahan K, Mahrokhian SH, et al. DNA  
643 vaccine protection against SARS-CoV-2 in rhesus macaques. Science. 2020;369(6505):806-11.  
644 Epub 2020/05/22. doi: 10.1126/science.abc6284. PubMed PMID: 32434945; PubMed Central  
645 PMCID: PMC7243363.
- 646 40. Patel A, Walters J, Reuschel EL, Schultheis K, Parzych E, Gary EN, et al. Intradermal-  
647 delivered DNA vaccine provides anamnestic protection in a rhesus macaque SARS-CoV-2  
648 challenge model. bioRxiv. 2020.
- 649 41. Corbett KS, Flynn B, Foulds KE, Francica JR, Boyoglu-Barnum S, Werner AP, et al.  
650 Evaluation of the mRNA-1273 Vaccine against SARS-CoV-2 in Nonhuman Primates. N Engl J  
651 Med. 2020. Epub 2020/07/30. doi: 10.1056/NEJMoa2024671. PubMed PMID: 32722908;  
652 PubMed Central PMCID: PMC7449230.
- 653 42. Yang J, Wang W, Chen Z, Lu S, Yang F, Bi Z, et al. A vaccine targeting the RBD of the S  
654 protein of SARS-CoV-2 induces protective immunity. Nature. 2020. Epub 2020/07/30. doi:  
655 10.1038/s41586-020-2599-8. PubMed PMID: 32726802.
- 656 43. Hatzioannou T, Ambrose Z, Chung NP, Piatak M, Jr., Yuan F, Trubey CM, et al. A  
657 macaque model of HIV-1 infection. Proc Natl Acad Sci U S A. 2009;106(11):4425-9. Epub  
658 2009/03/04. doi: 10.1073/pnas.0812587106. PubMed PMID: 19255423; PubMed Central  
659 PMCID: PMC2657417.
- 660 44. Zhou Y, Bao R, Haigwood NL, Persidsky Y, Ho WZ. SIV infection of rhesus macaques of  
661 Chinese origin: a suitable model for HIV infection in humans. Retrovirology. 2013;10:89. Epub  
662 2013/08/21. doi: 10.1186/1742-4690-10-89. PubMed PMID: 23947613; PubMed Central  
663 PMCID: PMC3765527.
- 664 45. Foreman TW, Mehra S, Lackner AA, Kaushal D. Translational Research in the  
665 Nonhuman Primate Model of Tuberculosis. ILAR J. 2017;58(2):151-9. Epub 2017/06/03. doi:  
666 10.1093/ilar/ilx015. PubMed PMID: 28575319; PubMed Central PMCID: PMC6279141.
- 667 46. Cardona PJ, Williams A. Experimental animal modelling for TB vaccine development.  
668 Int J Infect Dis. 2017;56:268-73. Epub 2017/02/07. doi: 10.1016/j.ijid.2017.01.030. PubMed  
669 PMID: 28163168.
- 670 47. Mooij P, Koopman G, Mortier D, van Heteren M, Oostermeijer H, Fagrouch Z, et al.  
671 Pandemic Swine-Origin H1N1 Influenza Virus Replicates to Higher Levels and Induces More  
672 Fever and Acute Inflammatory Cytokines in Cynomolgus versus Rhesus Monkeys and Can  
673 Replicate in Common Marmosets. PLoS One. 2015;10(5):e0126132. Epub 2015/05/07. doi:

- 674 10.1371/journal.pone.0126132. PubMed PMID: 25946071; PubMed Central PMCID:  
675 PMCPMC4422689.
- 676 48. Wang L. C-reactive protein levels in the early stage of COVID-19. *Med Mal Infect.*  
677 2020;50(4):332-4. Epub 2020/04/04. doi: 10.1016/j.medmal.2020.03.007. PubMed PMID:  
678 32243911; PubMed Central PMCID: PMCPMC7146693.
- 679 49. Ronco C, Reis T. Kidney involvement in COVID-19 and rationale for extracorporeal  
680 therapies. *Nat Rev Nephrol.* 2020;16(6):308-10. Epub 2020/04/11. doi: 10.1038/s41581-020-  
681 0284-7. PubMed PMID: 32273593; PubMed Central PMCID: PMCPMC7144544.
- 682 50. Ronco C, Reis T, Husain-Syed F. Management of acute kidney injury in patients with  
683 COVID-19. *Lancet Respir Med.* 2020;8(7):738-42. Epub 2020/05/18. doi: 10.1016/S2213-  
684 2600(20)30229-0. PubMed PMID: 32416769; PubMed Central PMCID: PMCPMC7255232.
- 685 51. Cheng Y, Luo R, Wang K, Zhang M, Wang Z, Dong L, et al. Kidney disease is associated  
686 with in-hospital death of patients with COVID-19. *Kidney Int.* 2020;97(5):829-38. Epub  
687 2020/04/06. doi: 10.1016/j.kint.2020.03.005. PubMed PMID: 32247631; PubMed Central  
688 PMCID: PMCPMC7110296.
- 689 52. Spiezia L, Boscolo A, Poletto F, Cerruti L, Tiberio I, Campello E, et al. COVID-19-Related  
690 Severe Hypercoagulability in Patients Admitted to Intensive Care Unit for Acute Respiratory  
691 Failure. *Thromb Haemost.* 2020;120(6):998-1000. Epub 2020/04/22. doi: 10.1055/s-0040-  
692 1710018. PubMed PMID: 32316063; PubMed Central PMCID: PMCPMC7295272.
- 693 53. Connors JM, Levy JH. COVID-19 and its implications for thrombosis and  
694 anticoagulation. *Blood.* 2020;135(23):2033-40. Epub 2020/04/28. doi:  
695 10.1182/blood.2020006000. PubMed PMID: 32339221; PubMed Central PMCID:  
696 PMCPMC7273827.
- 697 54. Munster VJ, Feldmann F, Williamson BN, van Doremalen N, Perez-Perez L, Schulz J, et  
698 al. Respiratory disease in rhesus macaques inoculated with SARS-CoV-2. *Nature.*  
699 2020;585(7824):268-72. Epub 2020/05/13. doi: 10.1038/s41586-020-2324-7. PubMed PMID:  
700 32396922; PubMed Central PMCID: PMCPMC7486227.
- 701 55. Coperchini F, Chiovato L, Croce L, Magri F, Rotondi M. The cytokine storm in COVID-  
702 19: An overview of the involvement of the chemokine/chemokine-receptor system. *Cytokine*  
703 *Growth Factor Rev.* 2020;53:25-32. Epub 2020/05/25. doi: 10.1016/j.cytogfr.2020.05.003.  
704 PubMed PMID: 32446778; PubMed Central PMCID: PMCPMC7211650.
- 705 56. Huang C, Wang Y, Li X, Ren L, Zhao J, Hu Y, et al. Clinical features of patients infected  
706 with 2019 novel coronavirus in Wuhan, China. *Lancet.* 2020;395(10223):497-506. Epub  
707 2020/01/28. doi: 10.1016/S0140-6736(20)30183-5. PubMed PMID: 31986264; PubMed  
708 Central PMCID: PMCPMC7159299.
- 709 57. Hope MD, Raptis CA, Shah A, Hammer MM, Henry TS, six s. A role for CT in COVID-19?  
710 What data really tell us so far. *Lancet.* 2020;395(10231):1189-90. Epub 2020/04/01. doi:  
711 10.1016/S0140-6736(20)30728-5. PubMed PMID: 32224299; PubMed Central PMCID:  
712 PMCPMC7195087.
- 713 58. Simpson S, Kay FU, Abbara S, Bhalla S, Chung JH, Chung M, et al. Radiological Society  
714 of North America Expert Consensus Statement on Reporting Chest CT Findings Related to  
715 COVID-19. Endorsed by the Society of Thoracic Radiology, the American College of Radiology,  
716 and RSNA - Secondary Publication. *J Thorac Imaging.* 2020;35(4):219-27. Epub 2020/04/24.  
717 doi: 10.1097/RTI.0000000000000524. PubMed PMID: 32324653; PubMed Central PMCID:  
718 PMCPMC7255403.
- 719 59. Fan L, Liu S. CT and COVID-19: Chinese experience and recommendations concerning  
720 detection, staging and follow-up. *Eur Radiol.* 2020;30(9):5214-6. Epub 2020/05/08. doi:

- 721 10.1007/s00330-020-06898-3. PubMed PMID: 32377812; PubMed Central PMCID:  
722 PMC7202679.
- 723 60. Brining DL, Mattoon JS, Kercher L, LaCasse RA, Safronetz D, Feldmann H, et al. Thoracic  
724 radiography as a refinement methodology for the study of H1N1 influenza in cynomolgus  
725 macaques (*Macaca fascicularis*). *Comp Med*. 2010;60(5):389-95. Epub 2011/01/26. PubMed  
726 PMID: 21262125; PubMed Central PMCID: PMC2958208.
- 727 61. Corman VM, Landt O, Kaiser M, Molenkamp R, Meijer A, Chu DK, et al. Detection of  
728 2019 novel coronavirus (2019-nCoV) by real-time RT-PCR. *Euro Surveill*. 2020;25(3). Epub  
729 2020/01/30. doi: 10.2807/1560-7917.ES.2020.25.3.2000045. PubMed PMID: 31992387;  
730 PubMed Central PMCID: PMC6988269.
- 731 62. Pan F, Ye T, Sun P, Gui S, Liang B, Li L, et al. Time Course of Lung Changes at Chest CT  
732 during Recovery from Coronavirus Disease 2019 (COVID-19). *Radiology*. 2020;295(3):715-21.  
733 Epub 2020/02/14. doi: 10.1148/radiol.2020200370. PubMed PMID: 32053470; PubMed  
734 Central PMCID: PMC7233367.
- 735 63. Hoste ACR, Venteo A, Fresco-Taboada A, Tapia I, Monedero A, Lopez L, et al. Two  
736 serological approaches for detection of antibodies to SARS-CoV-2 in different scenarios: a  
737 screening tool and a point-of-care test. *Diagn Microbiol Infect Dis*. 2020;98(4):115167. Epub  
738 2020/09/06. doi: 10.1016/j.diagmicrobio.2020.115167. PubMed PMID: 32890908; PubMed  
739 Central PMCID: PMC7417941.
- 740
- 741

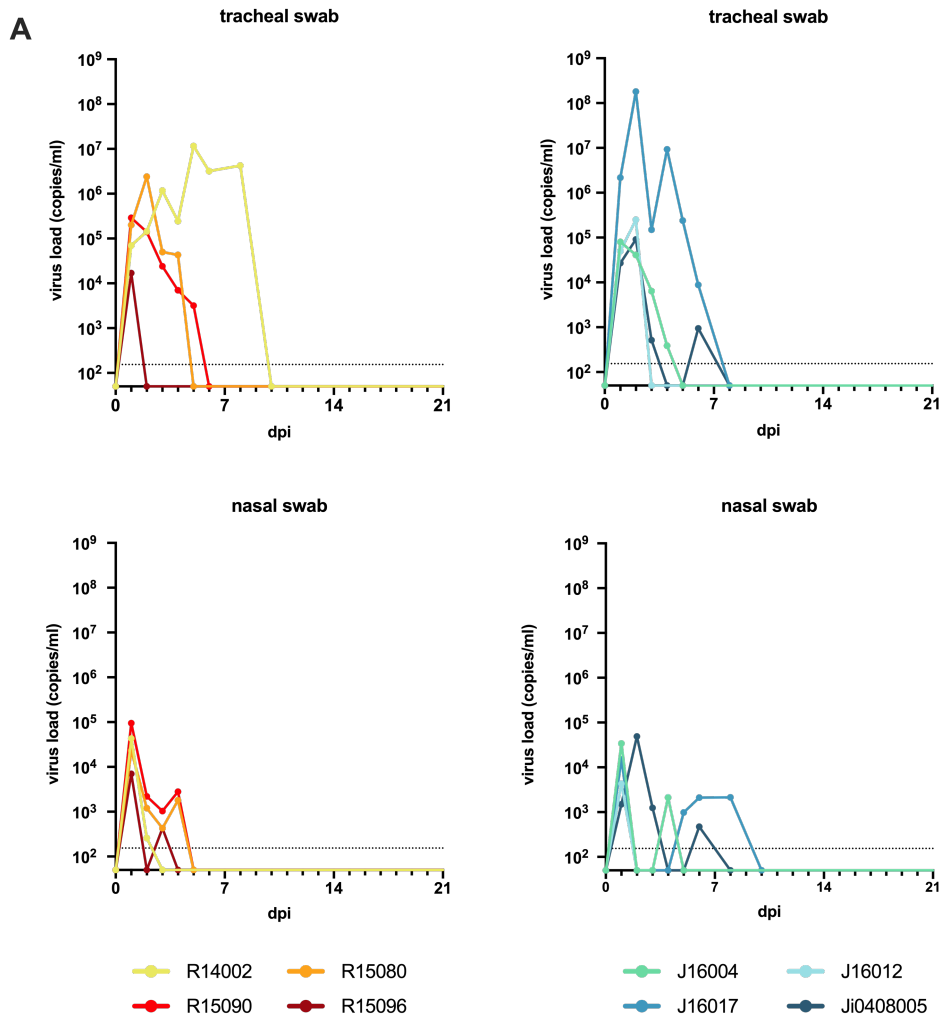

**B**

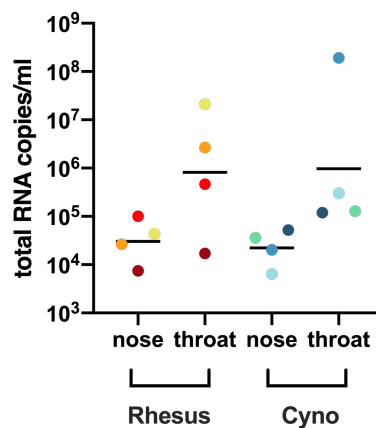

742

743 **Fig 1. Virus load in swab samples.** (A) Viral RNA quantification in tracheal and nasal swabs of

744 rhesus and cynomolgus macaques by qRT-PCR. The limit of quantification (154 RNA



745 copies/ml) is indicated by the dotted horizontal line. (B) Total virus loads in throat and nose  
746 samples of macaques throughout the study. Horizontal bars represent geometric means. The  
747 sum of the viral copies was calculated rather than area under the curve (AUC), as AUC  
748 interpolates for time points when virus loads were not determined.  
749 The different colors used for each animal as shown in the legend of 1A are used to denote  
750 the same individual in all figures of this manuscript. The group of rhesus macaques is  
751 indicated by yellow to red colors; cynomolgus macaques by green to blue. In each graph  
752 rhesus macaques are depicted left and cynomolgus macaques right.  
753

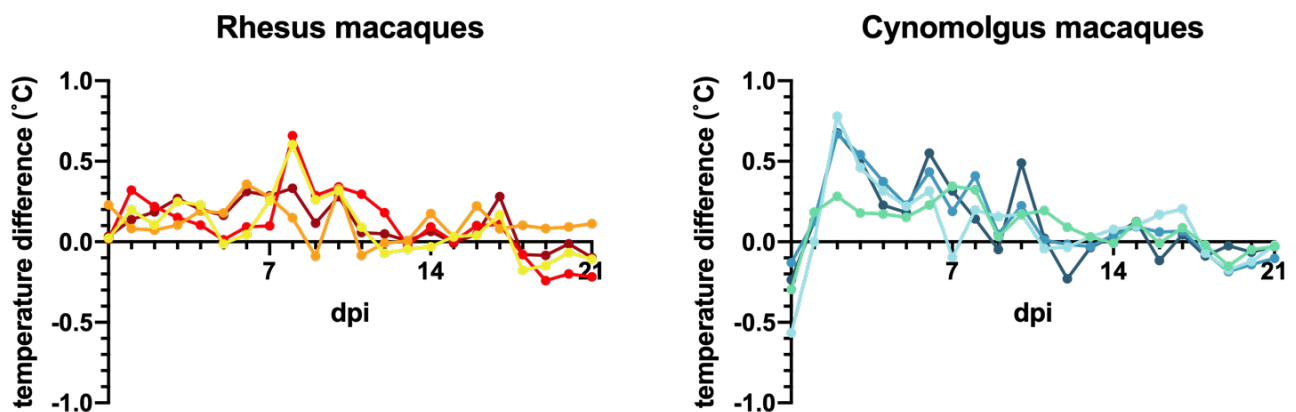

754  
755 **Fig 2. Body temperature during the study.** The body temperature was measured by  
756 telemetry throughout the study. The daily average body temperature of rhesus and  
757 cynomolgus macaques was calculated and the deviations from baseline body temperature  
758 (in °C) are depicted. Measurements done during biotechnical handlings were omitted from  
759 the calculations.

760

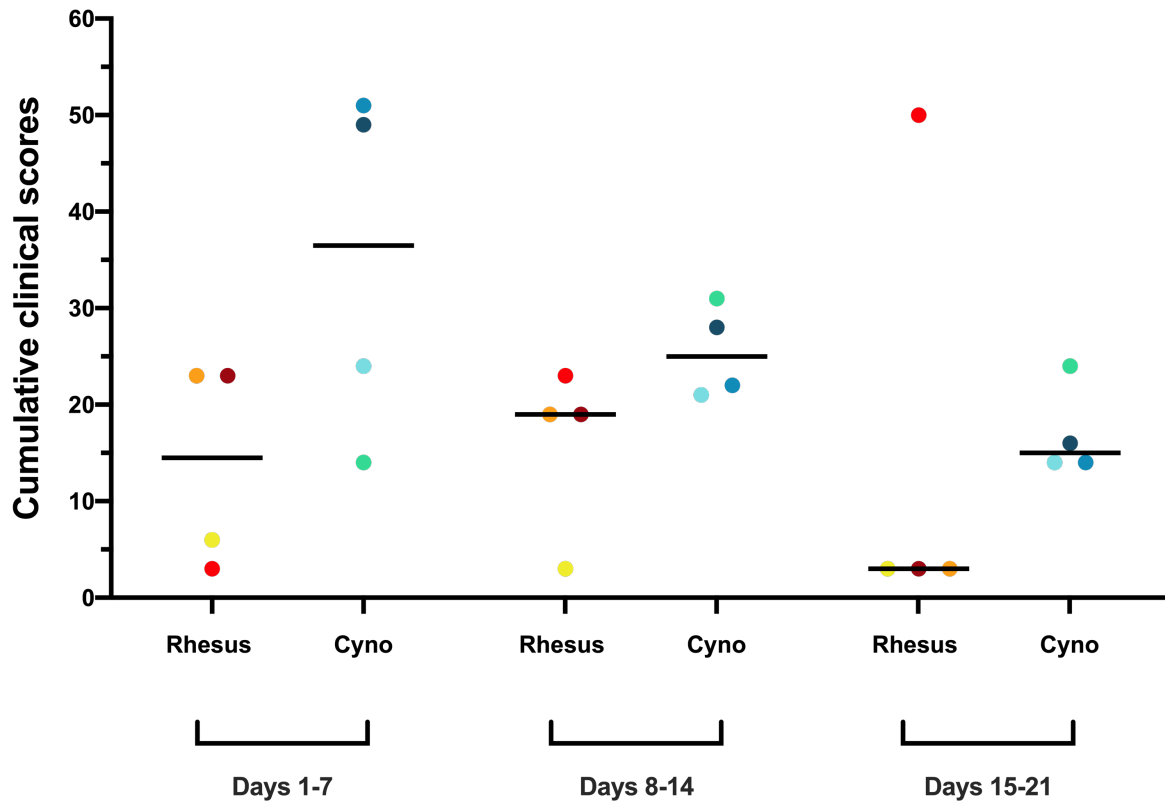

761

762 **Fig 3. Cumulative clinical scores.** The cumulative clinical scores were calculated per week

763 and per individual animal (day 1-7, 8-14 and 15-21). Horizontal bars represent medians.

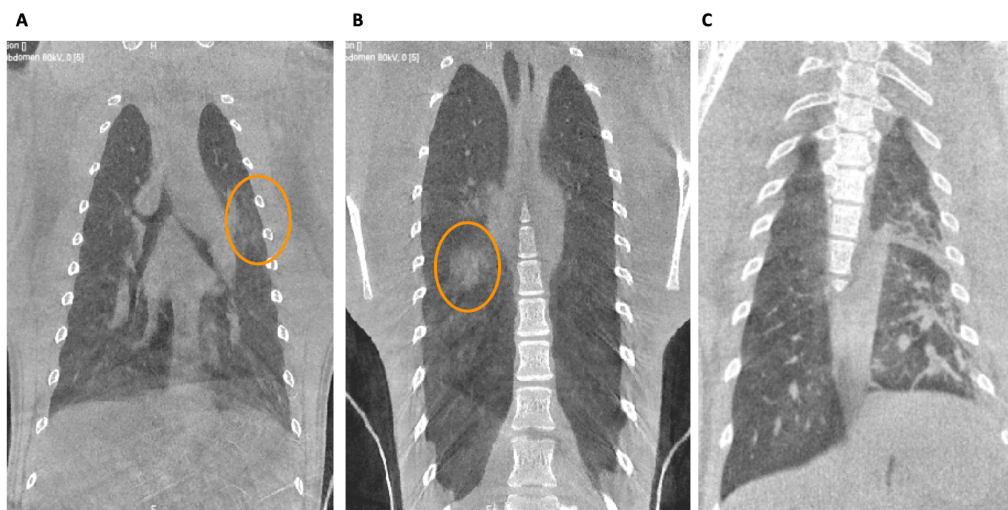

764

765 **Fig 4. Types of lung lesions detected via CT scans in SARS-CoV-2-infected macaques. (A)**

766 Ground glass opacities (GGO), (B) consolidations, and (C) crazy paving patterns (CCP).



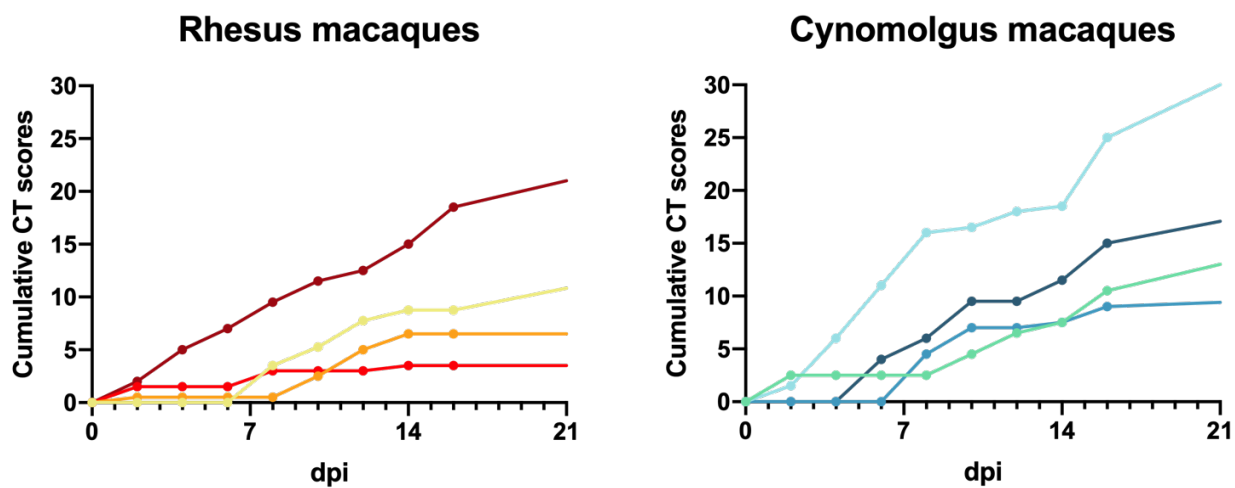

767

768 **Fig 5. Cumulative CT scores.** Cumulative CT scores for each animal were calculated based on

769 the CT scores depicted in Table 1.

770

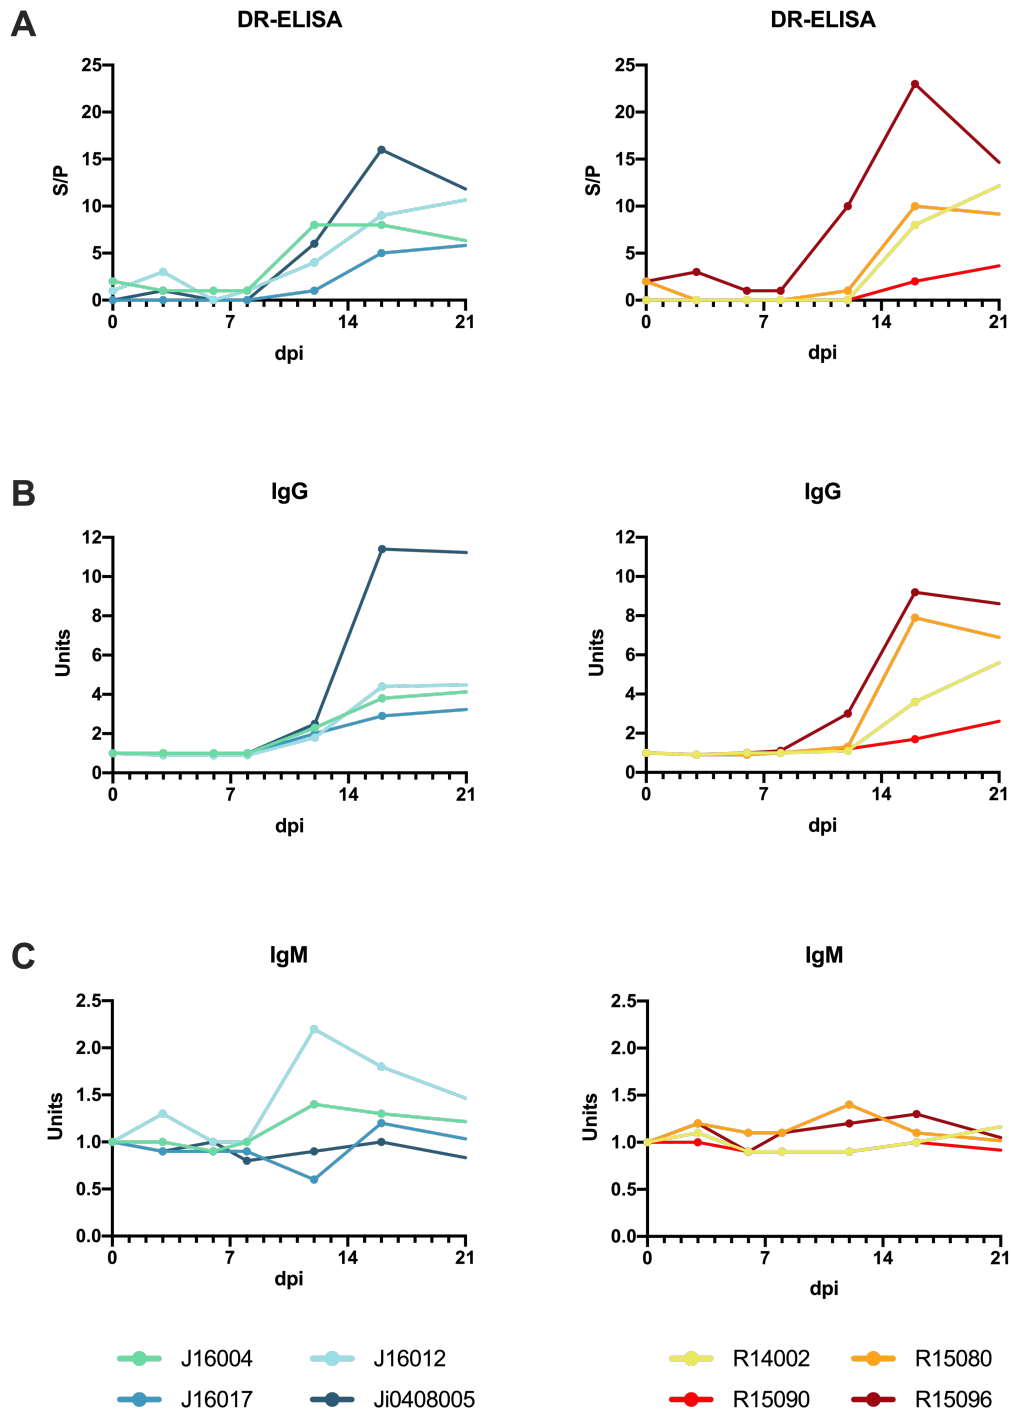

771

772 **Fig 6. Development of SARS-CoV-2 antibody response in rhesus and cynomolgus**

773 **macaques.** The humoral immune response was determined using (A) DR-ELISA measuring

774 the total antibody response, (B) an IgG-specific IgG assay, and (C) an IgM-specific IgM

775 serological test. Results are shown as S/P: sample to positive control ratio:

776 
$$S/P = \frac{\text{test sample} - \text{mean negative control}}{\text{mean positive control} - \text{mean negative control}} \text{ and } Units = \frac{\text{test sample at } x \text{ dpi}}{\text{test sample at } 0 \text{ dpi}}.$$
